# Supplementary material for: The exploration of new infrared nonlinear optical crystals based on the polymorphism of BaGa4S7
Source: Royal Society of Chemistry journal article supplement (doi:10.1039/d2qi01263d), 2022-01-01

# The Exploration of New Infrared Nonlinear Optical Crystals Based on Polymorphism of BaGa<sub>4</sub>S<sub>7</sub>

Zhen Qian,<sup>a</sup> Haonan Liu,<sup>a</sup> Yujie Zhang,<sup>a</sup> Hongping Wu,<sup>a</sup> Zhanggui Hu,<sup>a</sup> Jiyang Wang,<sup>a</sup>  
Yicheng Wu<sup>a</sup> and Hongwei Yu<sup>\*a</sup>

Correspondence: Hongwei Yu ([hwyu15@gmail.com](mailto:hwyu15@gmail.com))

<sup>a</sup>Tianjin Key Laboratory of Functional Crystal Materials, Institute of Functional Crystal,  
Tianjin University of Technology, Tianjin 300384, China.

## CONTENTS

|                                                                                                                   |     |
|-------------------------------------------------------------------------------------------------------------------|-----|
| 1. Table S1 (Atomic coordinates, displacement parameters and BVS) .....                                           | S2  |
| 2. Table S2 (Selected bond distances and angles) .....                                                            | S4  |
| 3. Table S3 (BSI and GII Indices for $\alpha$ -, $\beta$ - and $\gamma$ -BaGa <sub>4</sub> S <sub>7</sub> ) ..... | S11 |
| 4. Table S4 (Summary of the mode decomposition) .....                                                             | S14 |
| 5. Table S5 (Occupied Wyckoff positions and site-symmetries) .....                                                | S16 |
| 6. Table S6 (Atomic displacement in the distortion) .....                                                         | S18 |
| 7. Figure S1 (The Powder X-ray Diffraction of $\beta$ -BaGa <sub>4</sub> S <sub>7</sub> ) .....                   | S20 |
| 8. Figure S2 (The EDS for $\beta$ - and $\gamma$ -BaGa <sub>4</sub> S <sub>7</sub> ) .....                        | S21 |
| 9. Figure S3 (The coordination of Ba atoms) .....                                                                 | S23 |
| 10. Figure S4 (Structure comparison) .....                                                                        | S24 |
| 11. Figure S5 (Atomic displacements patterns) .....                                                               | S26 |

**Table S1a.** Atomic coordinates and  $U_{\text{eq}}$  [ $\text{\AA}^2$ ] for  $\beta$ -BaGa<sub>4</sub>S<sub>7</sub>.

| Atom | <i>x</i>    | <i>y</i>    | <i>z</i>     | $U_{\text{eq}}$ | BVS  |
|------|-------------|-------------|--------------|-----------------|------|
| Ba1  | 0.000000    | 0.4927(2)   | 0.39625(9)   | 0.0241(3)       | 1.80 |
| Ba2  | 0.500000    | 0.86999(16) | 0.14096(9)   | 0.0272(3)       | 1.78 |
| Ga1  | 0.24978(8)  | 1.14517(18) | -0.15007(12) | 0.0126(3)       | 3.08 |
| Ga2  | 0.37943(7)  | 0.66207(19) | -0.15468(12) | 0.0129(3)       | 3.03 |
| Ga3  | 0.11946(7)  | 1.0108(2)   | 0.09209(10)  | 0.0120(3)       | 3.07 |
| Ga4  | 0.24919(7)  | 0.4873(3)   | 0.10382(11)  | 0.0122(3)       | 3.07 |
| S1   | 0.000000    | 0.8082(5)   | 0.1438(4)    | 0.0133(7)       | 1.91 |
| S2   | 0.38529(17) | 1.0116(5)   | -0.1037(2)   | 0.0135(6)       | 1.94 |
| S3   | 0.11530(18) | 1.0143(5)   | -0.0983(2)   | 0.0145(6)       | 1.94 |
| S4   | 0.25341(17) | 0.8472(4)   | 0.1536(2)    | 0.0104(5)       | 2.17 |
| S5   | 0.38639(18) | 0.3744(4)   | 0.1576(2)    | 0.0158(6)       | 1.95 |
| S6   | 0.24478(17) | 1.5029(4)   | -0.0917(2)   | 0.0114(5)       | 2.18 |
| S7   | 0.500000    | 0.5079(6)   | -0.0722(3)   | 0.0159(8)       | 1.89 |
| S8   | 0.11521(18) | 1.3504(4)   | 0.1544(2)    | 0.0148(6)       | 1.96 |

$U_{\text{eq}}$  is defined as 1/3 of the trace of the orthogonalized  $U_{ij}$  tensor.

**Table S1b.** Atomic coordinates and  $U_{\text{eq}}$  [ $\text{\AA}^2$ ] for  $\gamma$ -BaGa<sub>4</sub>S<sub>7</sub>.

| Atom | x           | y           | z           | $U_{\text{eq}}$ | BVS  |
|------|-------------|-------------|-------------|-----------------|------|
| Ba1  | 0.17944(18) | 1.000000    | 0.8977(5)   | 0.0228(7)       | 1.80 |
| Ba2  | 0.34781(15) | 0.500000    | 0.6578(4)   | 0.0245(9)       | 1.74 |
| Ba3  | 0.51031(16) | 1.000000    | 1.1218(5)   | 0.0293(9)       | 1.78 |
| Ga1  | 0.5398(2)   | 0.74924(18) | 0.7820(6)   | 0.0102(7)       | 3.01 |
| Ga2  | 0.5471(2)   | 0.61980(18) | 0.3094(6)   | 0.0101(8)       | 3.03 |
| Ga3  | 0.70729(17) | 0.7509(2)   | 0.5551(5)   | 0.0104(9)       | 3.04 |
| Ga4  | 0.21459(17) | 0.6203(2)   | 0.0769(5)   | 0.0105(9)       | 2.99 |
| Ga5  | 0.37846(18) | 0.8802(3)   | 0.5285(4)   | 0.0116(9)       | 3.02 |
| Ga6  | 0.37586(15) | 0.7510(3)   | 0.0406(5)   | 0.0120(9)       | 2.99 |
| S1   | 0.3427(4)   | 0.8845(5)   | 0.1562(10)  | 0.0131(16)      | 1.91 |
| S2   | 0.6709(4)   | 0.7448(4)   | 0.8879(11)  | 0.0118(13)      | 1.93 |
| S3   | 0.6737(4)   | 0.6160(4)   | 0.3988(13)  | 0.0152(14)      | 1.96 |
| S4   | 0.3414(3)   | 0.6137(5)   | 0.1321(10)  | 0.0114(15)      | 1.95 |
| S5   | 0.5065(3)   | 0.7542(5)   | 1.1187(9)   | 0.0108(15)      | 1.92 |
| S6   | 0.8380(3)   | 0.7543(4)   | 0.6581(9)   | 0.0109(15)      | 2.07 |
| S7   | 0.5053(3)   | 0.8850(5)   | 0.6361(10)  | 0.0133(17)      | 2.03 |
| S8   | 0.6776(4)   | 0.8861(4)   | 0.3973(13)  | 0.0130(14)      | 1.96 |
| S9   | 0.5068(4)   | 0.6145(5)   | 0.6240(10)  | 0.0139(17)      | 1.91 |
| S10  | 0.5121(5)   | 0.500000    | 0.0825(13)  | 0.012(2)        | 1.90 |
| S11  | 0.3383(5)   | 1.000000    | 0.6948(13)  | 0.012(2)        | 1.98 |
| S12  | 0.1619(5)   | 0.500000    | -0.1219(14) | 0.017(2)        | 2.09 |

$U_{\text{eq}}$  is defined as 1/3 of the trace of the orthogonalized  $U_{ij}$  tensor.

**Table S2a.** Bond lengths and angles for  $\beta$ -BaGa<sub>4</sub>S<sub>7</sub>.

| Atom–Atom             | Length [Å] | Atom–Atom–Atom | Angle [°] |
|-----------------------|------------|----------------|-----------|
| Ba1–S8 <sup>#1</sup>  | 3.456(3)   | S8–Ba1–S8      | 58.66(9)  |
| Ba1–S8 <sup>#2</sup>  | 3.456(3)   | S8–Ba1–S1      | 124.43(7) |
| Ba1–S1 <sup>#3</sup>  | 3.493(4)   | S8–Ba1–S1      | 124.43(7) |
| Ba1–S3 <sup>#4</sup>  | 3.508(3)   | S8–Ba1–S3      | 118.46(7) |
| Ba1–S3 <sup>#5</sup>  | 3.508(3)   | S8–Ba1–S3      | 90.20(6)  |
| Ba1–S3 <sup>#3</sup>  | 3.585(3)   | S1–Ba1–S3      | 117.01(7) |
| Ba1–S3 <sup>#6</sup>  | 3.585(3)   | S8–Ba1–S3      | 90.20(6)  |
| Ba1–S1                | 3.590(4)   | S8–Ba1–S3      | 118.46(7) |
| Ba1–S6 <sup>#4</sup>  | 3.599(3)   | S1–Ba1–S3      | 117.01(7) |
| Ba1–S6 <sup>#5</sup>  | 3.599(3)   | S3–Ba1–S3      | 57.76(9)  |
| Ba1–S8 <sup>#4</sup>  | 3.642(3)   | S8–Ba1–S3      | 63.74(6)  |
| Ba1–S8 <sup>#5</sup>  | 3.642(3)   | S8–Ba1–S3      | 91.18(7)  |
| Ba2–S7                | 3.395(4)   | S1–Ba1–S3      | 60.78(7)  |
| Ba2–S2                | 3.479(3)   | S3–Ba1–S3      | 177.79(9) |
| Ba2–S2 <sup>#7</sup>  | 3.479(3)   | S3–Ba1–S3      | 122.87(7) |
| Ba2–S5                | 3.515(3)   | S8–Ba1–S3      | 91.18(7)  |
| Ba2–S5 <sup>#7</sup>  | 3.515(3)   | S8–Ba1–S3      | 63.74(6)  |
| Ba2–S2 <sup>#8</sup>  | 3.553(3)   | S1–Ba1–S3      | 60.78(7)  |
| Ba2–S2 <sup>#4</sup>  | 3.553(3)   | S3–Ba1–S3      | 122.87(7) |
| Ba2–S5 <sup>#9</sup>  | 3.564(3)   | S3–Ba1–S3      | 177.79(9) |
| Ba2–S5 <sup>#10</sup> | 3.564(3)   | S3–Ba1–S3      | 56.41(9)  |
| Ba2–S4 <sup>#7</sup>  | 3.629(3)   | S8–Ba1–S1      | 56.16(6)  |
| Ba2–S4                | 3.629(3)   | S8–Ba1–S1      | 56.16(6)  |
| Ga1–S3                | 2.224(3)   | S1–Ba1–S1      | 179.27(9) |
| Ga1–S2                | 2.227(3)   | S3–Ba1–S1      | 62.37(7)  |
| Ga1–S6                | 2.335(3)   | S3–Ba1–S1      | 62.37(7)  |
| Ga1–S4 <sup>#11</sup> | 2.338(3)   | S3–Ba1–S1      | 119.83(7) |
| Ga2–S7                | 2.242(3)   | S3–Ba1–S1      | 119.83(7) |
| Ga2–S5 <sup>#12</sup> | 2.248(3)   | S8–Ba1–S6      | 121.64(7) |
| Ga2–S2                | 2.262(3)   | S8–Ba1–S6      | 62.99(6)  |
| Ga2–S6 <sup>#2</sup>  | 2.337(3)   | S1–Ba1–S6      | 88.30(4)  |
| Ga3–S8                | 2.243(3)   | S3–Ba1–S6      | 60.66(6)  |
| Ga3–S1                | 2.248(2)   | S3–Ba1–S6      | 118.37(6) |
| Ga3–S3                | 2.267(3)   | S3–Ba1–S6      | 118.57(6) |
| Ga3–S4                | 2.334(3)   | S3–Ba1–S6      | 62.21(6)  |
| Ga4–S8 <sup>#2</sup>  | 2.228(3)   | S1–Ba1–S6      | 91.67(4)  |
| Ga4–S5                | 2.229(3)   | S8–Ba1–S6      | 62.99(6)  |
| Ga4–S4                | 2.320(3)   | S8–Ba1–S6      | 121.64(7) |
| Ga4–S6 <sup>#2</sup>  | 2.330(3)   | S1–Ba1–S6      | 88.30(4)  |

|           |           |           |           |
|-----------|-----------|-----------|-----------|
| S3-Ba1-S6 | 118.37(6) | S5-Ba2-S2 | 84.77(7)  |
| S3-Ba1-S6 | 60.66(6)  | S7-Ba2-S2 | 141.02(7) |
| S3-Ba1-S6 | 62.21(6)  | S2-Ba2-S2 | 115.71(6) |
| S3-Ba1-S6 | 118.57(6) | S2-Ba2-S2 | 153.31(3) |
| S1-Ba1-S6 | 91.67(4)  | S5-Ba2-S2 | 84.77(7)  |
| S6-Ba1-S6 | 175.34(9) | S5-Ba2-S2 | 111.06(7) |
| S8-Ba1-S8 | 178.30(4) | S2-Ba2-S2 | 56.64(9)  |
| S8-Ba1-S8 | 122.97(8) | S7-Ba2-S5 | 128.86(7) |
| S1-Ba1-S8 | 55.39(6)  | S2-Ba2-S5 | 92.87(7)  |
| S3-Ba1-S8 | 61.63(6)  | S2-Ba2-S5 | 66.18(7)  |
| S3-Ba1-S8 | 88.50(7)  | S5-Ba2-S5 | 173.56(9) |
| S3-Ba1-S8 | 116.16(7) | S5-Ba2-S5 | 123.29(8) |
| S3-Ba1-S8 | 90.09(7)  | S2-Ba2-S5 | 63.07(7)  |
| S1-Ba1-S8 | 124.00(7) | S2-Ba2-S5 | 89.51(7)  |
| S6-Ba1-S8 | 59.99(6)  | S7-Ba2-S5 | 128.86(7) |
| S6-Ba1-S8 | 115.39(6) | S2-Ba2-S5 | 66.18(7)  |
| S8-Ba1-S8 | 122.97(8) | S2-Ba2-S5 | 92.87(7)  |
| S8-Ba1-S8 | 178.30(4) | S5-Ba2-S5 | 123.29(8) |
| S1-Ba1-S8 | 55.39(6)  | S5-Ba2-S5 | 173.56(9) |
| S3-Ba1-S8 | 88.50(7)  | S2-Ba2-S5 | 89.51(7)  |
| S3-Ba1-S8 | 61.63(6)  | S2-Ba2-S5 | 63.07(7)  |
| S3-Ba1-S8 | 90.09(7)  | S5-Ba2-S5 | 55.86(9)  |
| S3-Ba1-S8 | 116.16(7) | S7-Ba2-S4 | 90.29(4)  |
| S1-Ba1-S8 | 124.00(7) | S2-Ba2-S4 | 121.90(6) |
| S6-Ba1-S8 | 115.39(6) | S2-Ba2-S4 | 63.96(6)  |
| S6-Ba1-S8 | 59.99(6)  | S5-Ba2-S4 | 115.94(6) |
| S8-Ba1-S8 | 55.40(8)  | S5-Ba2-S4 | 59.28(6)  |
| S7-Ba2-S2 | 62.79(7)  | S2-Ba2-S4 | 59.93(6)  |
| S7-Ba2-S2 | 62.79(7)  | S2-Ba2-S4 | 116.50(6) |
| S2-Ba2-S2 | 57.96(9)  | S5-Ba2-S4 | 64.19(6)  |
| S7-Ba2-S5 | 57.23(7)  | S5-Ba2-S4 | 119.99(6) |
| S2-Ba2-S5 | 92.28(7)  | S7-Ba2-S4 | 90.29(4)  |
| S2-Ba2-S5 | 120.00(7) | S2-Ba2-S4 | 63.96(6)  |
| S7-Ba2-S5 | 57.23(7)  | S2-Ba2-S4 | 121.90(6) |
| S2-Ba2-S5 | 120.00(7) | S5-Ba2-S4 | 59.28(6)  |
| S2-Ba2-S5 | 92.28(7)  | S5-Ba2-S4 | 115.94(6) |
| S5-Ba2-S5 | 56.70(8)  | S2-Ba2-S4 | 116.50(6) |
| S7-Ba2-S2 | 141.02(7) | S2-Ba2-S4 | 59.93(6)  |
| S2-Ba2-S2 | 153.31(3) | S5-Ba2-S4 | 119.99(6) |
| S2-Ba2-S2 | 115.71(6) | S5-Ba2-S4 | 64.19(6)  |
| S5-Ba2-S2 | 111.06(7) | S4-Ba2-S4 | 173.46(8) |

|           |            |           |            |
|-----------|------------|-----------|------------|
| S3–Ga1–S2 | 126.04(14) | S8–Ga3–S1 | 114.66(12) |
| S3–Ga1–S6 | 103.84(11) | S8–Ga3–S3 | 108.69(12) |
| S2–Ga1–S6 | 108.11(11) | S1–Ga3–S3 | 104.98(14) |
| S3–Ga1–S4 | 107.74(11) | S8–Ga3–S4 | 109.36(10) |
| S2–Ga1–S4 | 103.59(11) | S1–Ga3–S4 | 109.11(11) |
| S6–Ga1–S4 | 106.19(10) | S3–Ga3–S4 | 109.92(11) |
| S7–Ga2–S5 | 110.85(13) | S8–Ga4–S5 | 126.93(13) |
| S7–Ga2–S2 | 105.36(12) | S8–Ga4–S4 | 108.93(10) |
| S5–Ga2–S2 | 111.24(11) | S5–Ga4–S4 | 101.95(10) |
| S7–Ga2–S6 | 110.28(12) | S8–Ga4–S6 | 105.14(11) |
| S5–Ga2–S6 | 108.34(11) | S5–Ga4–S6 | 108.99(11) |
| S2–Ga2–S6 | 110.77(10) | S4–Ga4–S6 | 102.45(10) |

Symmetry transformations used to generate equivalent atoms:

#1:  $-X, -1+Y, +Z$ ; #2:  $+X, -1+Y, +Z$ ; #3:  $-X, 1-Y, 0.5+Z$ ; #4:  $+X, 2-Y, 0.5+Z$ ; #5:  $-X, 2-Y, 0.5+Z$ ; #6:  $+X, 1-Y, 0.5+Z$ ; #7:  $1-X, +Y, +Z$ ; #8:  $1-X, 2-Y, 0.5+Z$ ; #9:  $1-X, 1+Y, +Z$ ; #10:  $+X, 1+Y, +Z$ ; #11:  $+X, 2-Y, -0.5+Z$ ; #12:  $+X, 1-Y, -0.5+Z$ ; #13:  $-X, +Y, +Z$ ; #14:  $-X, 1-Y, -0.5+Z$ ; #15:  $1-X, 2-Y, -0.5+Z$ ; #16:  $-X, 2-Y, -0.5+Z$ ;

**Table S2b.** Bond lengths and angles for  $\gamma$ -BaGa<sub>4</sub>S<sub>7</sub>.

| <b>Atom–Atom</b>       | <b>Length [Å]</b> |                       |                  |
|------------------------|-------------------|-----------------------|------------------|
| Ba1–S11                | 3.445(9)          | Ga2–S10               | 2.254(6)         |
| Ba1–S1 <sup>#1</sup>   | 3.484(8)          | Ga2–S3                | 2.255(7)         |
| Ba1–S1 <sup>#2</sup>   | 3.484(7)          | Ga2–S9                | 2.256(8)         |
| Ba1–S3 <sup>#3</sup>   | 3.526(8)          | Ga2–S5 <sup>#12</sup> | 2.335(7)         |
| Ba1–S3 <sup>#4</sup>   | 3.526(8)          | Ga3–S8                | 2.228(7)         |
| Ba1–S10 <sup>#5</sup>  | 3.529(10)         | Ga3–S3                | 2.231(7)         |
| Ba1–S3 <sup>#5</sup>   | 3.582(7)          | Ga3–S2                | 2.327(8)         |
| Ba1–S3 <sup>#6</sup>   | 3.582(7)          | Ga3–S6                | 2.330(6)         |
| Ba1–S2 <sup>#3</sup>   | 3.606(6)          | Ga4–S12               | 2.242(6)         |
| Ba1–S2 <sup>#4</sup>   | 3.606(6)          | Ga4–S8 <sup>#3</sup>  | 2.259(9)         |
| Ba1–S9 <sup>#3</sup>   | 3.630(8)          | Ga4–S4                | 2.271(7)         |
| Ba1–S9 <sup>#4</sup>   | 3.630(8)          | Ga4–S2 <sup>#13</sup> | 2.349(7)         |
| Ba2–S9                 | 3.419(7)          | Ga5–S1                | 2.254(6)         |
| Ba2–S9 <sup>#7</sup>   | 3.419(7)          | Ga5–S11               | 2.257(6)         |
| Ba2–S4 <sup>#2</sup>   | 3.422(6)          | Ga5–S7                | 2.263(7)         |
| Ba2–S4 <sup>#8</sup>   | 3.422(6)          | Ga5–S6 <sup>#3</sup>  | 2.326(6)         |
| Ba2–S10 <sup>#2</sup>  | 3.500(8)          | Ga6–S1                | 2.228(6)         |
| Ba2–S8 <sup>#9</sup>   | 3.572(8)          | Ga6–S4                | 2.233(6)         |
| Ba2–S8 <sup>#3</sup>   | 3.572(8)          | Ga6–S6 <sup>#13</sup> | 2.317(6)         |
| Ba2–S6 <sup>#9</sup>   | 3.620(7)          | Ga6–S5 <sup>#12</sup> | 2.328(6)         |
| Ba2–S6 <sup>#3</sup>   | 3.620(7)          |                       |                  |
| Ba2–S4                 | 3.654(6)          | <b>Atom–Atom–Atom</b> | <b>Angle [°]</b> |
| Ba2–S4 <sup>#7</sup>   | 3.654(6)          | S11–Ba1–S1            | 57.33(17)        |
| Ba3–S7 <sup>#10</sup>  | 3.449(7)          | S11–Ba1–S1            | 57.33(17)        |
| Ba3–S7                 | 3.449(7)          | S1–Ba1–S1             | 58.4(3)          |
| Ba3–S12 <sup>#11</sup> | 3.475(10)         | S11–Ba1–S3            | 61.64(17)        |
| Ba3–S8 <sup>#1</sup>   | 3.557(8)          | S1–Ba1–S3             | 118.95(19)       |
| Ba3–S8 <sup>#2</sup>   | 3.557(8)          | S1–Ba1–S3             | 90.64(17)        |
| Ba3–S1 <sup>#2</sup>   | 3.565(8)          | S11–Ba1–S3            | 61.64(17)        |
| Ba3–S1 <sup>#1</sup>   | 3.565(8)          | S1–Ba1–S3             | 90.64(17)        |
| Ba3–S11                | 3.605(9)          | S1–Ba1–S3             | 118.95(19)       |
| Ba3–S5                 | 3.619(7)          | S3–Ba1–S3             | 58.0(2)          |
| Ba3–S5 <sup>#10</sup>  | 3.619(7)          | S11–Ba1–S10           | 177.6(2)         |
| Ba3–S7 <sup>#1</sup>   | 3.644(6)          | S1–Ba1–S10            | 124.61(18)       |
| Ba3–S7 <sup>#2</sup>   | 3.644(6)          | S1–Ba1–S10            | 124.61(18)       |
| Ga1–S7                 | 2.223(7)          | S3–Ba1–S10            | 116.34(17)       |
| Ga1–S9                 | 2.232(8)          | S3–Ba1–S10            | 116.34(17)       |
| Ga1–S5                 | 2.323(7)          | S11–Ba1–S3            | 121.65(17)       |
| Ga1–S2                 | 2.337(7)          | S1–Ba1–S3             | 64.33(16)        |
|                        |                   | S1–Ba1–S3             | 91.84(17)        |

|            |            |            |            |
|------------|------------|------------|------------|
| S3-Ba1-S3  | 176.7(2)   | S3-Ba1-S9  | 61.54(16)  |
| S3-Ba1-S3  | 122.43(18) | S10-Ba1-S9 | 54.83(16)  |
| S10-Ba1-S3 | 60.35(16)  | S3-Ba1-S9  | 89.00(17)  |
| S11-Ba1-S3 | 121.65(17) | S3-Ba1-S9  | 115.17(17) |
| S1-Ba1-S3  | 91.84(17)  | S2-Ba1-S9  | 115.24(15) |
| S1-Ba1-S3  | 64.33(16)  | S2-Ba1-S9  | 59.93(15)  |
| S3-Ba1-S3  | 122.43(18) | S9-Ba1-S9  | 55.3(2)    |
| S3-Ba1-S3  | 176.7(2)   | S9-Ba2-S9  | 59.1(2)    |
| S10-Ba1-S3 | 60.35(16)  | S9-Ba2-S4  | 91.10(15)  |
| S3-Ba1-S3  | 57.0(2)    | S9-Ba2-S4  | 120.07(17) |
| S11-Ba1-S2 | 91.77(10)  | S9-Ba2-S4  | 120.07(17) |
| S1-Ba1-S2  | 121.62(16) | S9-Ba2-S4  | 91.10(15)  |
| S1-Ba1-S2  | 63.21(16)  | S4-Ba2-S4  | 58.5(2)    |
| S3-Ba1-S2  | 60.60(15)  | S9-Ba2-S10 | 56.91(17)  |
| S3-Ba1-S2  | 118.50(14) | S9-Ba2-S10 | 56.91(17)  |
| S10-Ba1-S2 | 88.16(10)  | S4-Ba2-S10 | 63.22(16)  |
| S3-Ba1-S2  | 118.74(14) | S4-Ba2-S10 | 63.22(16)  |
| S3-Ba1-S2  | 61.84(15)  | S9-Ba2-S8  | 150.34(18) |
| S11-Ba1-S2 | 91.77(10)  | S9-Ba2-S8  | 113.96(17) |
| S1-Ba1-S2  | 63.21(16)  | S4-Ba2-S8  | 114.47(19) |
| S1-Ba1-S2  | 121.62(16) | S4-Ba2-S8  | 87.43(17)  |
| S3-Ba1-S2  | 118.50(14) | S10-Ba2-S8 | 147.49(14) |
| S3-Ba1-S2  | 60.60(15)  | S9-Ba2-S8  | 113.96(17) |
| S10-Ba1-S2 | 88.16(10)  | S9-Ba2-S8  | 150.34(18) |
| S3-Ba1-S2  | 61.84(15)  | S4-Ba2-S8  | 87.43(17)  |
| S3-Ba1-S2  | 118.74(14) | S4-Ba2-S8  | 114.47(19) |
| S2-Ba1-S2  | 175.1(2)   | S10-Ba2-S8 | 147.49(14) |
| S11-Ba1-S9 | 123.18(19) | S8-Ba2-S8  | 56.0(2)    |
| S1-Ba1-S9  | 178.45(19) | S9-Ba2-S6  | 122.37(15) |
| S1-Ba1-S9  | 123.14(15) | S9-Ba2-S6  | 63.31(16)  |
| S3-Ba1-S9  | 61.54(16)  | S4-Ba2-S6  | 118.42(15) |
| S3-Ba1-S9  | 88.46(17)  | S4-Ba2-S6  | 59.96(15)  |
| S10-Ba1-S9 | 54.83(16)  | S10-Ba2-S6 | 91.91(9)   |
| S3-Ba1-S9  | 115.17(17) | S8-Ba2-S6  | 59.55(13)  |
| S3-Ba1-S9  | 89.00(17)  | S8-Ba2-S6  | 115.55(14) |
| S2-Ba1-S9  | 59.93(15)  | S9-Ba2-S6  | 63.31(16)  |
| S2-Ba1-S9  | 115.24(15) | S9-Ba2-S6  | 122.37(15) |
| S11-Ba1-S9 | 123.18(19) | S4-Ba2-S6  | 59.96(15)  |
| S1-Ba1-S9  | 123.14(15) | S4-Ba2-S6  | 118.42(15) |
| S1-Ba1-S9  | 178.45(19) | S10-Ba2-S6 | 91.91(9)   |
| S3-Ba1-S9  | 88.46(17)  | S8-Ba2-S6  | 115.55(13) |



|            |            |             |            |
|------------|------------|-------------|------------|
| S8-Ba2-S6  | 59.55(13)  | S1-Ba3-S1   | 57.0(2)    |
| S6-Ba2-S6  | 174.31(19) | S7-Ba3-S11  | 61.25(16)  |
| S9-Ba2-S4  | 64.09(14)  | S7-Ba3-S11  | 61.25(16)  |
| S9-Ba2-S4  | 90.82(15)  | S12-Ba3-S11 | 109.2(2)   |
| S4-Ba2-S4  | 123.3(2)   | S8-Ba3-S11  | 148.96(13) |
| S4-Ba2-S4  | 175.80(19) | S8-Ba3-S11  | 148.96(13) |
| S10-Ba2-S4 | 120.90(16) | S1-Ba3-S11  | 55.23(15)  |
| S8-Ba2-S4  | 88.38(16)  | S1-Ba3-S11  | 55.23(15)  |
| S8-Ba2-S4  | 62.72(16)  | S7-Ba3-S5   | 119.32(15) |
| S6-Ba2-S4  | 117.83(15) | S7-Ba3-S5   | 60.54(14)  |
| S6-Ba2-S4  | 63.40(14)  | S12-Ba3-S5  | 90.82(9)   |
| S9-Ba2-S4  | 90.82(15)  | S8-Ba3-S5   | 119.18(14) |
| S9-Ba2-S4  | 64.09(14)  | S8-Ba3-S5   | 62.90(14)  |
| S4-Ba2-S4  | 175.80(19) | S1-Ba3-S5   | 60.50(15)  |
| S4-Ba2-S4  | 123.3(2)   | S1-Ba3-S5   | 117.46(15) |
| S10-Ba2-S4 | 120.90(16) | S11-Ba3-S5  | 89.06(9)   |
| S8-Ba2-S4  | 62.72(16)  | S7-Ba3-S5   | 60.54(14)  |
| S8-Ba2-S4  | 88.38(16)  | S7-Ba3-S5   | 119.32(15) |
| S6-Ba2-S4  | 63.40(14)  | S12-Ba3-S5  | 90.81(9)   |
| S6-Ba2-S4  | 117.83(15) | S8-Ba3-S5   | 62.90(14)  |
| S4-Ba2-S4  | 54.5(2)    | S8-Ba3-S5   | 119.17(14) |
| S7-Ba3-S7  | 58.8(2)    | S1-Ba3-S5   | 117.46(15) |
| S7-Ba3-S12 | 58.11(15)  | S1-Ba3-S5   | 60.50(15)  |
| S7-Ba3-S12 | 58.11(15)  | S11-Ba3-S5  | 89.06(9)   |
| S7-Ba3-S8  | 91.68(17)  | S5-Ba3-S5   | 177.84(19) |
| S7-Ba3-S8  | 119.49(19) | S7-Ba3-S7   | 122.8(2)   |
| S12-Ba3-S8 | 61.44(18)  | S7-Ba3-S7   | 176.66(18) |
| S7-Ba3-S8  | 119.49(19) | S12-Ba3-S7  | 125.18(17) |
| S7-Ba3-S8  | 91.68(17)  | S8-Ba3-S7   | 63.77(17)  |
| S12-Ba3-S8 | 61.44(18)  | S8-Ba3-S7   | 89.78(18)  |
| S8-Ba3-S8  | 56.3(2)    | S1-Ba3-S7   | 87.95(15)  |
| S7-Ba3-S1  | 116.47(17) | S1-Ba3-S7   | 61.39(14)  |
| S7-Ba3-S1  | 88.71(16)  | S11-Ba3-S7  | 116.50(15) |
| S12-Ba3-S1 | 144.99(15) | S5-Ba3-S7   | 117.69(14) |
| S8-Ba3-S1  | 148.5(2)   | S5-Ba3-S7   | 62.33(14)  |
| S8-Ba3-S1  | 113.77(17) | S7-Ba3-S7   | 176.66(18) |
| S7-Ba3-S1  | 88.71(16)  | S7-Ba3-S7   | 122.8(2)   |
| S7-Ba3-S1  | 116.47(17) | S12-Ba3-S7  | 125.18(16) |
| S12-Ba3-S1 | 144.99(15) | S8-Ba3-S7   | 89.78(18)  |
| S8-Ba3-S1  | 113.77(17) | S8-Ba3-S7   | 63.77(17)  |
| S8-Ba3-S1  | 148.5(2)   | S1-Ba3-S7   | 61.39(14)  |

|            |            |            |          |
|------------|------------|------------|----------|
| S1–Ba3–S7  | 87.95(15)  | S3–Ga3–S6  | 107.3(3) |
| S11–Ba3–S7 | 116.50(16) | S2–Ga3–S6  | 104.6(3) |
| S5–Ba3–S7  | 62.33(15)  | S12–Ga4–S8 | 105.9(3) |
| S5–Ba3–S7  | 117.69(14) | S12–Ga4–S4 | 109.8(3) |
| S7–Ba3–S7  | 55.4(2)    | S8–Ga4–S4  | 112.2(3) |
| S7–Ga1–S9  | 126.7(3)   | S12–Ga4–S2 | 109.9(3) |
| S7–Ga1–S5  | 103.3(3)   | S8–Ga4–S2  | 109.8(3) |
| S9–Ga1–S5  | 108.9(3)   | S4–Ga4–S2  | 109.0(3) |
| S7–Ga1–S2  | 108.2(3)   | S1–Ga5–S11 | 113.8(3) |
| S9–Ga1–S2  | 104.5(3)   | S1–Ga5–S7  | 109.1(2) |
| S5–Ga1–S2  | 102.9(3)   | S11–Ga5–S7 | 105.4(3) |
| S10–Ga2–S3 | 104.9(3)   | S1–Ga5–S6  | 110.1(2) |
| S10–Ga2–S9 | 114.4(3)   | S11–Ga5–S6 | 109.8(2) |
| S3–Ga2–S9  | 108.5(3)   | S7–Ga5–S6  | 108.4(2) |
| S10–Ga2–S5 | 109.6(3)   | S1–Ga6–S4  | 126.9(2) |
| S3–Ga2–S5  | 109.3(3)   | S1–Ga6–S6  | 109.0(2) |
| S9–Ga2–S5  | 109.9(3)   | S4–Ga6–S6  | 101.5(2) |
| S8–Ga3–S3  | 126.1(4)   | S1–Ga6–S5  | 105.2(2) |
| S8–Ga3–S2  | 109.6(3)   | S4–Ga6–S5  | 107.8(2) |
| S3–Ga3–S2  | 104.2(3)   | S6–Ga6–S5  | 104.7(2) |
| S8–Ga3–S6  | 103.2(3)   |            |          |

Symmetry transformations used to generate equivalent atoms:

#1: +X, 2-Y, 1+Z; #2: +X, +Y, 1+Z; #3: -0.5+X, 1.5-Y, +Z; #4: -0.5+X, 0.5+Y, +Z; #5: -0.5+X, 0.5+Y, 1+Z; #6: -0.5+X, 1.5-Y, 1+Z; #7: +X, 1-Y, +Z; #8: +X, 1-Y, 1+Z; #9: -0.5+X, -0.5+Y, +Z; #10: +X, 2-Y, +Z; #11: 0.5+X, 0.5+Y, 1+Z; #12: +X, +Y, -1+Z; #13: -0.5+X, 1.5-Y, -1+Z; #14: 0.5+X, 1.5-Y, 1+Z; #15: 0.5+X, -0.5+Y, +Z; #16: 0.5+X, -0.5+Y, -1+Z; #17: 0.5+X, 1.5-Y, +Z; #18: 0.5+X, 0.5+Y, +Z; #19: -0.5+X, -0.5+Y, -1+Z;

**Table S3a.** Selected Bond Lengths, Experimental Bond Valences, Theoretical Bond Valences, Bond Valence Sums, and BSI and GII Indices for  $\alpha$ -BaGa<sub>4</sub>S<sub>7</sub>.

|                       |               | Ba1      |          | Ga1    |        | Ga2    | $V_i = \sum_j S_{ij}$ |
|-----------------------|---------------|----------|----------|--------|--------|--------|-----------------------|
|                       |               |          |          |        |        |        | $z_i = \sum_j s_{ij}$ |
| S1                    | $R_{ij}$ (Å)  | 3.4358×2 | 3.6673×2 | 2.2317 |        | 2.2711 |                       |
|                       | $S_{ij}$ (vu) | 0.1766   | 0.1179   | 0.8011 |        | 0.7384 | 1.9282                |
|                       | $s_{ij}$ (vu) | 0.1623   | 0.1623   | 0.8053 |        | 0.6895 | 2                     |
| S2                    | $R_{ij}$ (Å)  | 3.6264×2 |          | 2.334  | 2.3357 | 2.3215 |                       |
|                       | $S_{ij}$ (vu) | 0.1266   |          | 0.6481 | 0.6459 | 0.6652 | 2.2009                |
|                       | $s_{ij}$ (vu) | 0.0158   |          | 0.6947 | 0.6947 | 0.5789 | 2                     |
| S3                    | $R_{ij}$ (Å)  | 3.5136×2 | 3.5714×2 | 2.2284 |        | 2.2586 |                       |
|                       | $S_{ij}$ (vu) | 0.1542   | 0.1394   | 0.8065 |        | 0.7577 | 1.9268                |
|                       | $s_{ij}$ (vu) | 0.1263   | 0.1263   | 0.8053 |        | 0.6895 | 2                     |
| S4                    | $R_{ij}$ (Å)  | 3.4209×2 |          |        |        | 2.2567 |                       |
|                       | $S_{ij}$ (vu) | 0.1813   |          |        |        | 0.7606 | 1.9035                |
|                       | $s_{ij}$ (vu) | 0.4789   |          |        |        | 1.0421 | 2                     |
| $V_j = \sum_i S_{ij}$ |               | 1.8104   |          | 3.041  |        | 3.0615 | BSI=0.124             |
| $z_j = \sum_i s_{ij}$ |               | 2        |          | 3      |        | 3      | GII=0.120             |

**Table S3b.** Selected Bond Lengths, Experimental Bond Valences, Theoretical Bond Valences, Bond Valence Sums, and BSI and GII Indices for  $\beta$ -BaGa<sub>4</sub>S<sub>7</sub>.

|                       |               | Ba1      |          | Ba2      |          | Ga1    | Ga2    | Ga3    | Ga4    | $V_i = \sum_j S_{ij}$ | $z_i = \sum_j s_{ij}$ |
|-----------------------|---------------|----------|----------|----------|----------|--------|--------|--------|--------|-----------------------|-----------------------|
| S1                    | $R_{ij}$ (Å)  | 3.5904×2 |          |          |          |        |        | 2.2477 |        |                       |                       |
|                       | $S_{ij}$ (vu) | 0.1349   |          |          |          |        |        | 0.775  |        | 1.91                  |                       |
|                       | $s_{ij}$ (vu) | 0.4771   |          |          |          |        |        | 1.0459 |        | 2                     |                       |
| S2                    | $R_{ij}$ (Å)  |          |          | 3.5530×2 | 3.4787×2 | 2.2272 | 2.2617 |        |        |                       |                       |
|                       | $S_{ij}$ (vu) |          |          | 0.144    | 0.1639   | 0.8085 | 0.7528 |        |        | 1.94                  |                       |
|                       | $s_{ij}$ (vu) |          |          | 0.1463   | 0.1463   | 0.7974 | 0.6173 |        |        | 2                     |                       |
| S3                    | $R_{ij}$ (Å)  | 3.5846×2 | 3.5076×2 |          |          | 2.2243 |        | 2.2672 |        |                       |                       |
|                       | $S_{ij}$ (vu) | 0.1362   | 0.1558   |          |          | 0.8134 |        | 0.7443 |        | 1.94                  |                       |
|                       | $s_{ij}$ (vu) | 0.1244   | 0.1244   |          |          | 0.8091 |        | 0.6932 |        | 2                     |                       |
| S4                    | $R_{ij}$ (Å)  |          |          | 3.6289×2 |          | 2.338  |        | 2.334  | 2.3201 |                       |                       |
|                       | $S_{ij}$ (vu) |          |          | 0.1261   |          | 0.6428 |        | 0.6482 | 0.6672 | 2.18                  |                       |
|                       | $s_{ij}$ (vu) |          |          | 0.0325   |          | 0.6836 |        | 0.5677 | 0.6836 | 2                     |                       |
| S5                    | $R_{ij}$ (Å)  |          |          | 3.5635×2 | 3.5149×2 |        | 2.2481 |        | 2.229  |                       |                       |
|                       | $S_{ij}$ (vu) |          |          | 0.1413   | 0.1539   |        | 0.7743 |        | 0.8056 | 1.95                  |                       |
|                       | $s_{ij}$ (vu) |          |          | 0.1463   | 0.1463   |        | 0.6173 |        | 0.7974 | 2                     |                       |
| S6                    | $R_{ij}$ (Å)  | 3.5994×2 |          |          |          | 2.3353 | 2.3365 |        | 2.33   |                       |                       |
|                       | $S_{ij}$ (vu) | 0.1328   |          |          |          | 0.6464 | 0.6448 |        | 0.6535 | 2.19                  |                       |
|                       | $s_{ij}$ (vu) | 0.0252   |          |          |          | 0.7099 | 0.5298 |        | 0.7099 | 2                     |                       |
| S7                    | $R_{ij}$ (Å)  |          |          | 3.3952   |          |        | 2.2416 |        |        |                       |                       |
|                       | $S_{ij}$ (vu) |          |          | 0.1896   |          |        | 0.7849 |        |        | 1.89                  |                       |
|                       | $s_{ij}$ (vu) |          |          | 0.7645   |          |        | 1.2355 |        |        | 2                     |                       |
| S8                    | $R_{ij}$ (Å)  | 3.4559×2 | 3.6416×2 |          |          |        |        | 2.2425 | 2.2279 |                       |                       |
|                       | $S_{ij}$ (vu) | 0.1706   | 0.1233   |          |          |        |        | 0.7833 | 0.8075 | 1.96                  |                       |
|                       | $s_{ij}$ (vu) | 0.1244   | 0.1244   |          |          |        |        | 0.6932 | 0.8091 | 2                     |                       |
| $V_j = \sum_i S_{ij}$ |               | 1.7986   |          | 1.7754   |          | 3.0306 | 3.0797 | 3.0881 | 3.0741 | BSI=0.158             |                       |
| $z_j = \sum_i s_{ij}$ |               | 2        |          | 2        |          | 3      | 3      | 3      | 3      | GII=0.123             |                       |

**Table S3c.** Selected Bond Lengths, Experimental Bond Valences, Theoretical Bond Valences, Bond Valence Sums, and BSI and GII Indices for  $\gamma$ -BaGa<sub>4</sub>S<sub>7</sub>.

|                     |               | Ba1      |          | Ba2      |          | Ba3      |          | Ga1    | Ga2    | Ga3    | Ga4    | Ga5    | Ga6       | $V_i = \sum S_{ij}$ | $z_i = \sum S_{ij}$ |
|---------------------|---------------|----------|----------|----------|----------|----------|----------|--------|--------|--------|--------|--------|-----------|---------------------|---------------------|
| S1                  | $R_{ij}$ (Å)  | 3.4826×2 |          |          |          | 3.563×2  |          |        |        |        |        | 2.2494 | 2.2286    |                     |                     |
|                     | $S_{ij}$ (vu) | 0.1628   |          |          |          | 0.1415   |          |        |        |        |        | 0.7722 | 0.8062    | 1.88                |                     |
|                     | $s_{ij}$ (vu) | 0.1594   |          |          |          | 0.0894   |          |        |        |        |        | 0.6873 | 0.8151    | 2                   |                     |
| S2                  | $R_{ij}$ (Å)  | 3.608×2  |          |          |          |          |          | 2.3368 |        | 2.3314 | 2.3453 |        |           |                     |                     |
|                     | $S_{ij}$ (vu) | 0.1308   |          |          |          |          |          | 0.6444 |        | 0.6517 | 0.6332 |        |           | 2.06                |                     |
|                     | $s_{ij}$ (vu) | 0        |          |          |          |          |          | 0.6617 |        | 0.7496 | 0.5887 |        |           | 2                   |                     |
| S3                  | $R_{ij}$ (Å)  | 3.5328×2 | 3.5762×2 |          |          |          |          |        |        | 2.2562 | 2.2334 |        |           |                     |                     |
|                     | $S_{ij}$ (vu) | 0.1491   | 0.1382   |          |          |          |          |        |        | 0.7614 | 0.7983 |        |           | 1.86                |                     |
|                     | $s_{ij}$ (vu) | 0.1149   | 0.1149   |          |          |          |          |        |        | 0.676  | 0.8645 |        |           | 2                   |                     |
| S4                  | $R_{ij}$ (Å)  |          |          | 3.6494×2 | 3.4227×2 |          |          |        |        |        |        | 2.2638 | 2.2391    |                     |                     |
|                     | $S_{ij}$ (vu) |          |          | 0.1217   | 0.1807   |          |          |        |        |        |        | 0.7495 | 0.7889    | 1.78                |                     |
|                     | $s_{ij}$ (vu) |          |          | 0.1633   | 0.1633   |          |          |        |        |        |        | 0.5589 | 0.7878    | 2                   |                     |
| S5                  | $R_{ij}$ (Å)  |          |          |          |          | 3.6216×2 |          |        | 2.3227 | 2.3353 |        |        | 2.3326    |                     |                     |
|                     | $S_{ij}$ (vu) |          |          |          |          | 0.1277   |          |        | 0.6636 | 0.6464 |        |        | 0.6501    | 2.09                |                     |
|                     | $s_{ij}$ (vu) |          |          |          |          | -0.0177  |          |        | 0.714  | 0.6134 |        |        | 0.708     | 2                   |                     |
| S6                  | $R_{ij}$ (Å)  |          |          | 3.6204×2 |          |          |          |        |        |        | 2.3324 | 2.3229 | 2.3217    |                     |                     |
|                     | $S_{ij}$ (vu) |          |          | 0.128    |          |          |          |        |        |        | 0.6503 | 0.6632 | 0.6649    | 2.11                |                     |
|                     | $s_{ij}$ (vu) |          |          | 0.0645   |          |          |          |        |        |        | 0.621  | 0.5611 | 0.689     | 2                   |                     |
| S7                  | $R_{ij}$ (Å)  |          |          |          |          | 3.4545×2 | 3.6409×2 | 2.2208 |        |        |        |        | 2.2636    |                     |                     |
|                     | $S_{ij}$ (vu) |          |          |          |          | 0.171    | 0.1235   | 0.8194 |        |        |        |        | 0.7498    | 1.91                |                     |
|                     | $s_{ij}$ (vu) |          |          |          |          | 0.1117   | 0.1117   | 0.8435 |        |        |        |        | 0.7096    | 2                   |                     |
| S8                  | $R_{ij}$ (Å)  |          |          | 3.5715×2 |          |          |          |        |        |        | 2.2266 | 2.2592 |           |                     |                     |
|                     | $S_{ij}$ (vu) |          |          | 0.1394   |          |          |          |        |        |        | 0.8096 | 0.7567 |           |                     | 1.85                |
|                     | $s_{ij}$ (vu) |          |          | 0.2084   |          |          |          |        |        |        | 0.7649 | 0.604  |           |                     | 2                   |
| S9                  | $R_{ij}$ (Å)  | 3.6333×2 | 3.4226×2 |          |          |          |          |        | 2.2324 | 2.2495 |        |        |           |                     |                     |
|                     | $S_{ij}$ (vu) | 0.1251   | 0.1808   |          |          |          |          |        | 0.8    | 0.7721 |        |        |           |                     | 1.88                |
|                     | $s_{ij}$ (vu) | 0.1191   | 0.1503   |          |          |          |          |        | 0.7808 | 0.6802 |        |        |           |                     | 2                   |
| S10                 | $R_{ij}$ (Å)  | 3.5254   | 3.5041   |          |          |          |          |        |        |        | 2.2546 |        |           |                     |                     |
|                     | $S_{ij}$ (vu) | 0.1511   | 0.1568   |          |          |          |          |        |        |        | 0.764  |        |           | 1.84                |                     |
|                     | $s_{ij}$ (vu) | 0.4692   | 0.5004   |          |          |          |          |        |        |        | 1.0303 |        |           | 2                   |                     |
| S11                 | $R_{ij}$ (Å)  | 3.4508   |          |          |          | 3.609    |          |        |        |        |        | 2.2515 |           |                     |                     |
|                     | $S_{ij}$ (vu) | 0.1721   |          |          |          | 0.1306   |          |        |        |        |        | 0.7689 |           |                     | 1.84                |
|                     | $s_{ij}$ (vu) | 0.5141   |          |          |          | 0.444    |          |        |        |        |        | 1.0419 |           |                     | 2                   |
| S12                 | $R_{ij}$ (Å)  | 3.4826×2 |          |          |          | 3.4854   |          |        |        |        |        | 2.2412 |           |                     |                     |
|                     | $S_{ij}$ (vu) | 0.1628   |          |          |          | 0.162    |          |        |        |        |        | 0.7855 |           |                     | 1.90                |
|                     | $s_{ij}$ (vu) | 0.1594   |          |          |          | 0.7516   |          |        |        |        |        | 1.2484 |           |                     | 2                   |
| $V_i = \sum S_{ij}$ | 1.8032        |          | 1.795    |          | 1.7782   |          | 3.0701   | 3.0826 | 3.0321 | 3.0469 | 3.0945 | 3.0456 | BSI=0.161 |                     |                     |
| $z_i = \sum S_{ij}$ | 2             |          | 2        |          | 2        |          | 3        | 3      | 3      | 3      | 3      | 3      | GII=0.133 |                     |                     |

**Table S4a.** Summary of the mode decomposition of  $\alpha$ -BaGa<sub>4</sub>S<sub>7</sub>, indicating the amplitudes (Å) of all intervening irrep distortion components.

| Irrep        | Isotropy Subgroup                 | Dimension | Amplitude (Å) |
|--------------|-----------------------------------|-----------|---------------|
| $\Gamma_1^+$ | <i>Pmmn</i> (No. 59)              | 12        | 0.4656        |
| $\Gamma_4^-$ | <i>Pmn2</i> <sub>1</sub> (No. 31) | 7         | 1.4766        |

**Table S4b.** Summary of the mode decomposition of  $\beta$ -BaGa<sub>4</sub>S<sub>7</sub>, indicating the amplitudes (Å) of all intervening irrep distortion components.

| Irrep        | Isotropy Subgroup                | Dimension | Amplitude (Å) |
|--------------|----------------------------------|-----------|---------------|
| $\Gamma_1^+$ | <i>Pnma</i> (No. 62)             | 19        | 9.1434        |
| $\Gamma_3^-$ | <i>Pmc2<sub>1</sub></i> (No. 26) | 19        | 8.2889        |

**Table S5a.** Occupied Wyckoff positions and site-symmetries for the paraelectric centrosymmetric  $\alpha$ -BaGa<sub>4</sub>S<sub>7</sub> structure in space group *Pmmn*.

| <b>Atom</b> | <b>Wyckoff Site</b> | <b>x</b> | <b>y</b> | <b>z</b> |
|-------------|---------------------|----------|----------|----------|
| Ba(1)       | 2 <i>a</i>          | 0.750000 | 0.750000 | 0.836820 |
| Ga(1)       | 4 <i>f</i>          | 0.496910 | 0.750000 | 0.189080 |
| Ga(2)       | 4 <i>f</i>          | 0.369250 | 0.750000 | 0.676620 |
| S(1)        | 4 <i>f</i>          | 0.637330 | 0.750000 | 0.311330 |
| S(2)        | 4 <i>f</i>          | 0.510390 | 0.750000 | 0.821230 |
| S(3)        | 4 <i>f</i>          | 0.354730 | 0.750000 | 0.318150 |
| S(4)        | 2 <i>b</i>          | 0.250000 | 0.750000 | 0.899810 |



**Table S5b.** Occupied Wyckoff positions and site-symmetries for the paraelectric centrosymmetric  $\beta$ -BaGa<sub>4</sub>S<sub>7</sub> structure in space group *Pnma*.

| <b>Atom</b> | <b>Wyckoff Site</b> | <b>x</b> | <b>y</b> | <b>z</b> |
|-------------|---------------------|----------|----------|----------|
| Ba(1)       | <i>4c</i>           | 0.607250 | 0.250000 | 0.837830 |
| Ga(1)       | <i>8d</i>           | 0.093120 | 0.507520 | 0.311060 |
| Ga(2)       | <i>8d</i>           | 0.072610 | 0.635170 | 0.825950 |
| S(1)        | <i>4c</i>           | 0.368870 | 0.250000 | 0.113230 |
| S(2)        | <i>8d</i>           | 0.140810 | 0.642620 | 0.166960 |
| S(3)        | <i>8d</i>           | 0.122590 | 0.365530 | 0.180370 |

**Table S6a.** Atomic displacement in the distortion of the  $\alpha$ -BaGa<sub>4</sub>S<sub>7</sub>.

| WP | Atom    | Atomic Displacements |         |         |         |      |
|----|---------|----------------------|---------|---------|---------|------|
|    |         | $u_x$                | $u_y$   | $u_z$   | $ u $   |      |
| 2a | (0,y,z) | Ba1                  | 0       | 0.0056  | 0.0236  | 0.14 |
| 4b | (x,y,z) | Ga1                  | 0.0016  | 0.0013  | -0.0627 | 0.37 |
| 4b | (x,y,z) | Ga2                  | 0.0003  | 0.0041  | -0.0794 | 0.47 |
| 4b | (x,y,z) | S1                   | -0.0024 | 0.0012  | 0.0372  | 0.22 |
| 4b | (x,y,z) | S2                   | -0.0066 | -0.0065 | 0.0443  | 0.28 |
| 4b | (x,y,z) | S3                   | 0.0091  | -0.0075 | 0.0289  | 0.22 |
| 2a | (0,y,z) | S4                   | 0       | 0.032   | 0.0402  | 0.31 |

**Table S6b.** Atomic displacement in the distortion of the  $\beta$ -BaGa<sub>4</sub>S<sub>7</sub>.

| WP | Atom      | Atomic Displacements |         |         |         |      |
|----|-----------|----------------------|---------|---------|---------|------|
|    |           | $u_x$                | $u_y$   | $u_z$   | $ u $   |      |
| 2a | (0,y,z)   | Ba1                  | 0       | -0.0951 | -0.0541 | 0.87 |
| 2b | (1/2,y,z) | Ba1_2                | 0       | 0.0422  | -0.0949 | 1.16 |
| 4c | (x,y,z)   | Ga1                  | -0.1381 | -0.0503 | 0.1558  | 2.76 |
| 4c | (x,y,z)   | Ga1_2                | 0.1369  | -0.2231 | 0.0953  | 2.69 |
| 4c | (x,y,z)   | Ga2                  | -0.136  | -0.0887 | 0.1881  | 3.05 |
| 4c | (x,y,z)   | Ga2_2                | 0.1349  | -0.2211 | 0.0794  | 2.59 |
| 2a | (0,y,z)   | S1                   | 0       | -0.055  | -0.0682 | 0.88 |
| 2b | (1/2,y,z) | S1_2                 | 0       | 0.1447  | -0.0465 | 1.05 |
| 4c | (x,y,z)   | S2                   | -0.0073 | 0.0946  | -0.0876 | 1.20 |
| 4c | (x,y,z)   | S2_2                 | 0.0078  | -0.0666 | -0.0479 | 0.71 |
| 4c | (x,y,z)   | S3                   | -0.0002 | 0.0839  | -0.064  | 0.92 |
| 4c | (x,y,z)   | S3_2                 | 0.0019  | -0.056  | -0.0629 | 0.82 |
| 4c | (x,y,z)   | S4                   | -0.0047 | -0.0828 | -0.0755 | 1.03 |
| 4c | (x,y,z)   | S4_2                 | 0.0029  | 0.0729  | -0.0488 | 0.73 |

**Figure S1.** The Powder XRD patterns of  $\beta$ -BaGa<sub>4</sub>S<sub>7</sub>.

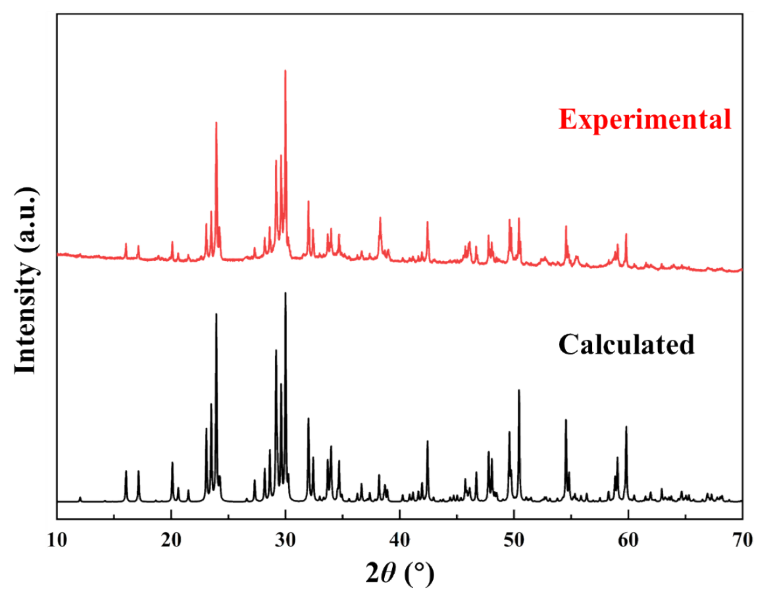

Figure S2a. The EDS spectra of  $\beta$ -BaGa<sub>4</sub>S<sub>7</sub>.

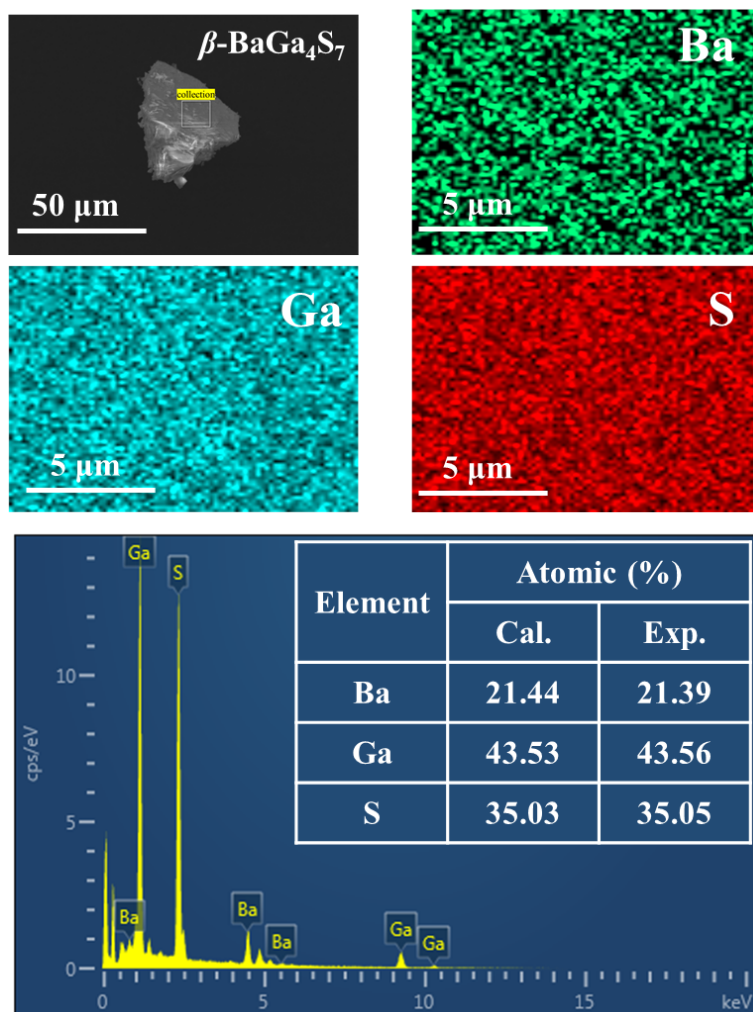

Figure 2b. The EDS spectra of  $\gamma$ -BaGa<sub>4</sub>S<sub>7</sub>.

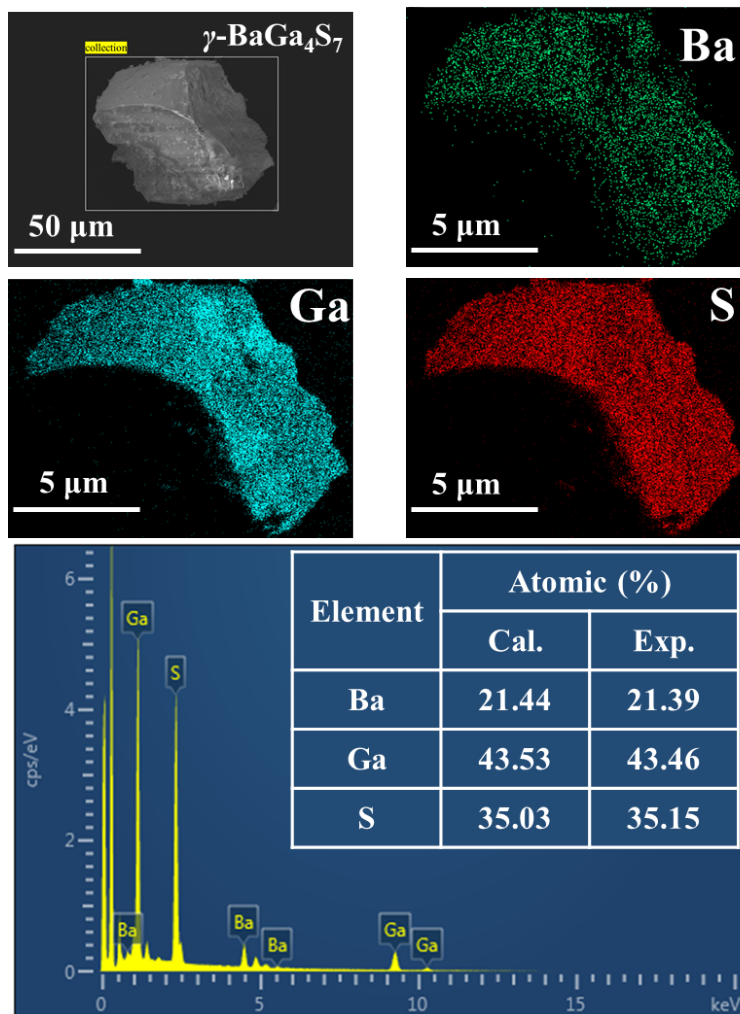

**Figure S3.** the coordination of Ba atoms in the  $\alpha$ -,  $\beta$ - and  $\gamma$ -BaGa<sub>4</sub>S<sub>7</sub>.

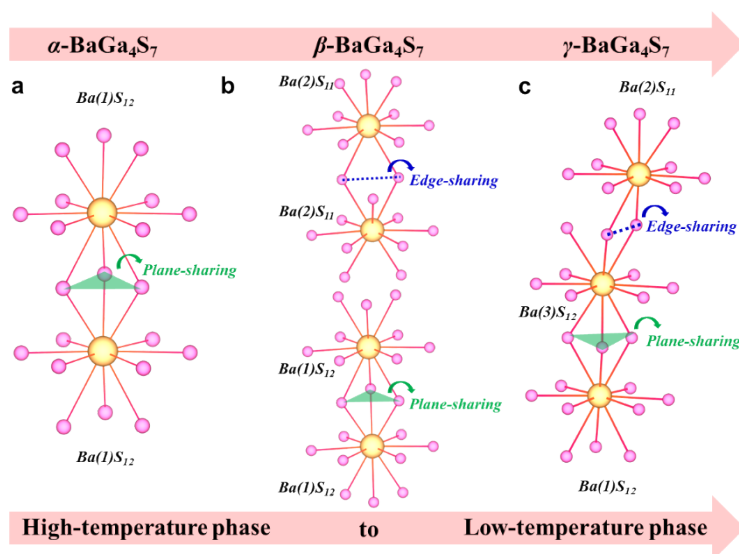

**Figure S4a.** Comparison between the centrosymmetric ( $Pmmn$ ) and non-centrosymmetric ( $Pmn2_1$ ) structures projected down the  $a$ -axis, **a** and **e**, the  $b$ -axis, **b** and **f**, and the  $c$ -axis, **c** and **g**, respectively.

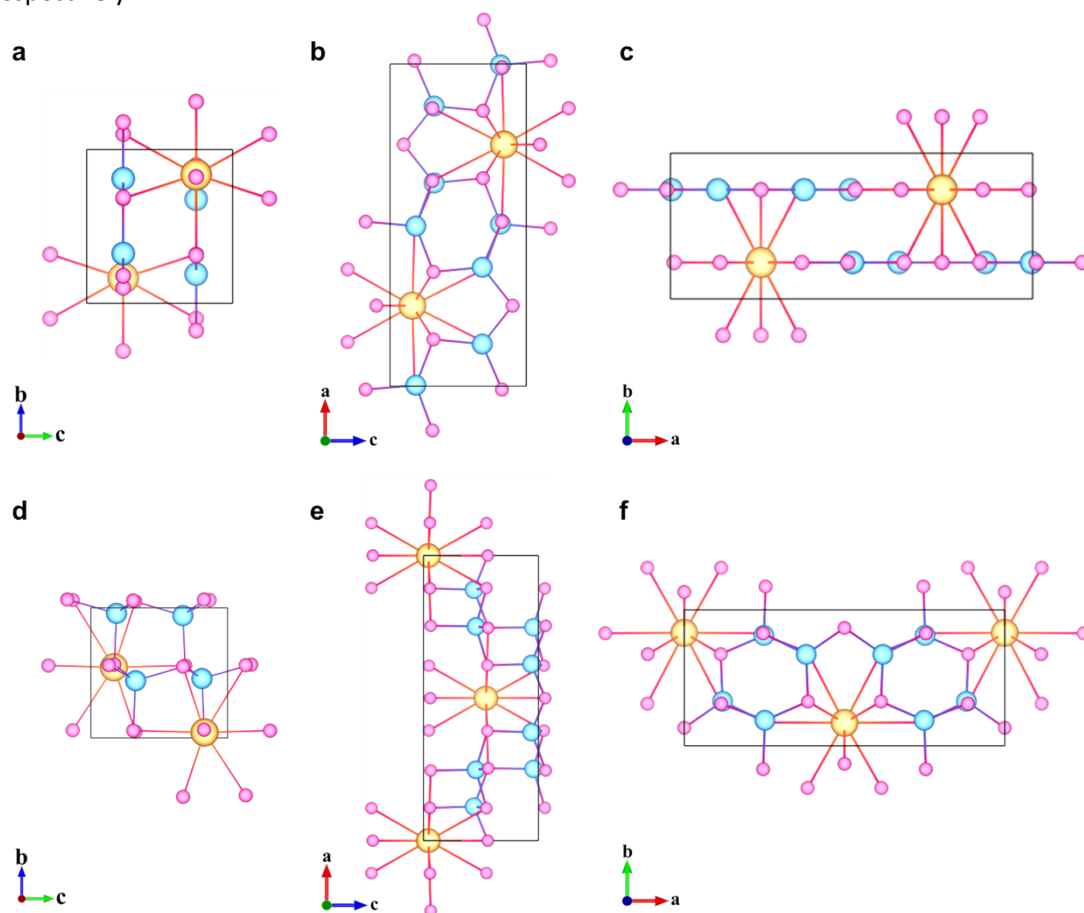



**Figure S4b.** Comparison between the centrosymmetric ( $Pnma$ ) and non-centrosymmetric ( $Pmc2_1$ ) structures projected down the  $a$ -axis, **a** and **e**, the  $b$ -axis, **f** and **g**, and the  $c$ -axis, **c** and **d**, respectively.

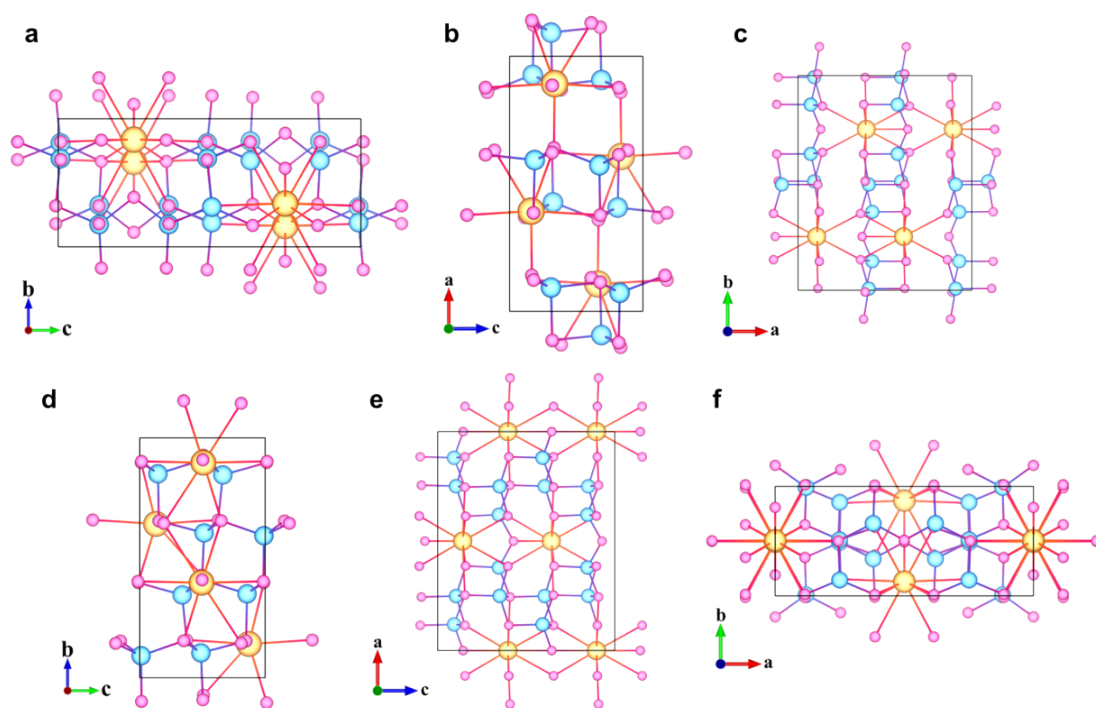

**Figure S5a.** Atomic displacements patterns from the centrosymmetric (top column) to polar  $\alpha$ -BaGa<sub>4</sub>S<sub>7</sub> structure (bottom column) for atoms belonging to the  $2a$ ,  $2b$  and  $4f$  Wyckoff positions projected about different crystallographic directions.

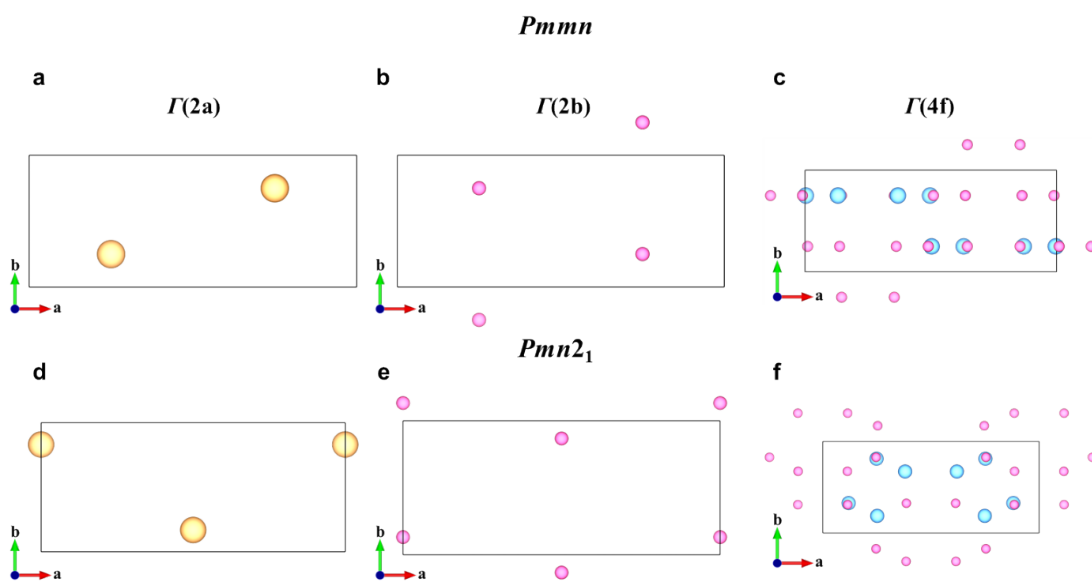

**Figure S5b.** Atomic displacements patterns from the centrosymmetric (top column) to polar  $\beta$ -BaGa<sub>4</sub>S<sub>7</sub> structure (bottom column) for atoms belonging to the 4c and 8d Wyckoff positions projected about different crystallographic directions.

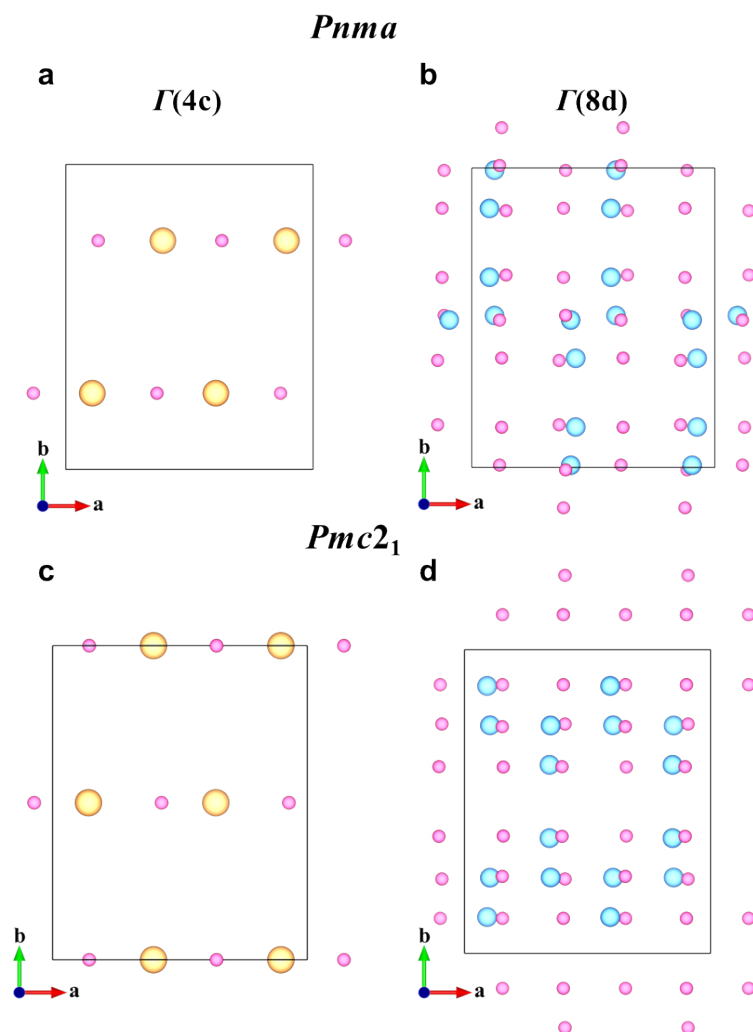

Supplement: d2qi01263d1.pdf [file d2qi01263d1.pdf]
